# Supplementary material for: Characterization of vB_ApiM_fHyAci03, a novel lytic bacteriophage that infects clinical Acinetobacter strains
Source: Springer Nature journal article supplement (doi:10.1007/s00705-019-04284-z), 2019-05-23
Supplement: MOESM1 [file 16745116]

# Characterization of fHyAci03, a novel lytic bacteriophage that infects clinical *Acinetobacter* strains

## Archives of Virology

Elsi Pulkkinen<sup>1,2</sup>, Anu Wicklund<sup>1,2</sup>, Joseph M. O. Oduor<sup>2,3</sup>, Mikael Skurnik<sup>1,2</sup>, and Saija Kiljunen<sup>2</sup>

<sup>1</sup>Division of Clinical Microbiology, HUSLAB, University of Helsinki and Helsinki University Hospital, Helsinki, Finland.

<sup>2</sup>Department of Bacteriology and Immunology, Medicum, Research Programs Unit, Immunobiology Research Program, University of Helsinki, Helsinki, Finland

<sup>3</sup>Department of Medical Microbiology, KAVI-ICR, University of Nairobi, Nairobi, Kenya

Corresponding author:

Saija Kiljunen, [saija.kiljunen@helsinki.fi](mailto:saija.kiljunen@helsinki.fi)

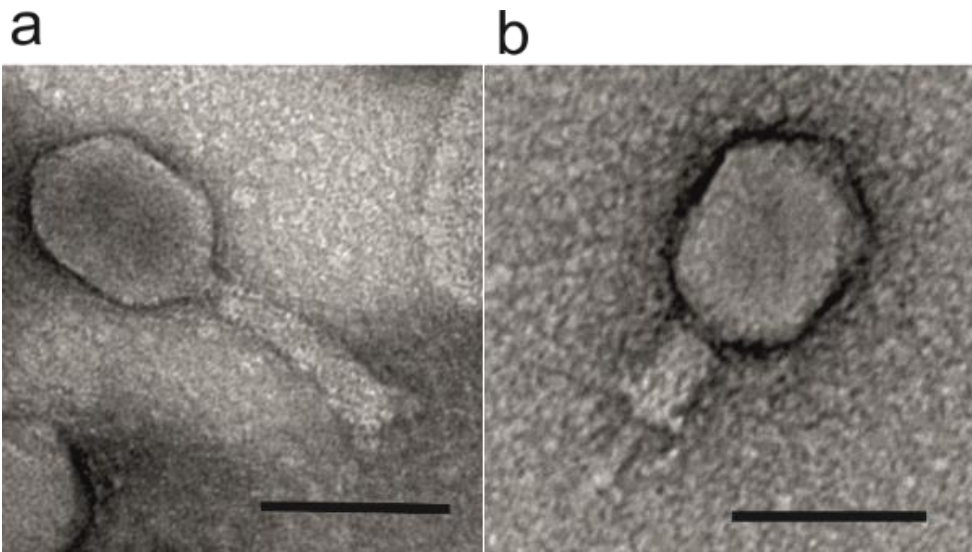

**Supplementary Fig. 1** Electron micrographs of negatively stained vB\_ApiM\_fHyAci03 (fHyAci03) particles. Phage particles with non-contracted (a) and contracted (b) tails are shown. Samples were examined at the Electron Microscopy Unit (Institute of Biotechnology, University of Helsinki, Helsinki, Finland) with a JEOL JEM-1400 transmission electron microscope JEOL Ltd., Tokyo, Japan. Bars represent 100 nm

**Supplementary Table 1** Host range of fHyAci03

| <i>Acinetobacter</i> species (n) | fHyAci03 sensitivity |           |
|----------------------------------|----------------------|-----------|
|                                  | Sensitive            | Resistant |
| <i>A. baumannii</i> (17)         | 0                    | 17        |
| <i>A. calcoaceticus</i> (1)      | 0                    | 1         |
| <i>A. junii</i> (1)              | 0                    | 1         |
| <i>A. lwoffii</i> (3)            | 0                    | 3         |
| <i>A. nosocomialis</i> (3)       | 2                    | 1         |
| <i>A. pittii</i> (18)            | 6                    | 12        |
| <i>A. radioresistens</i> (2)     | 0                    | 2         |
| <i>A. ursingii</i> (3)           | 0                    | 3         |

Sensitive (EOP>10<sup>-3</sup>), resistant (EOP<10<sup>-6</sup>). An EOP of 1 was equivalent to 5.3x10<sup>8</sup> PFU/ml with *Acinetobacter pittii* strain #5565 as the host

**Supplementary Table S2** tRNAs, their positions in fHyAci03 genome, products, and anticodons

| <b>tRNA #</b> | <b>Start position</b> | <b>End position</b> | <b>Amino acid</b> | <b>Anticodon</b> |
|---------------|-----------------------|---------------------|-------------------|------------------|
| 1             | 77217                 | 77148               | Met               | CAT              |
| 2             | 77140                 | 77065               | Cys               | GCA              |
| 3             | 76985                 | 76908               | Leu               | TAG              |
| 4             | 75353                 | 75283               | Thr               | TGT              |
| 5             | 74994                 | 74904               | Ser               | TGA              |
| 6             | 74898                 | 74822               | Pro               | TGG              |
| 7             | 74812                 | 74737               | Phe               | GAA              |
| 8             | 74354                 | 74280               | Trp               | CCA              |

**Supplementary Table S3** Whole genome BLASTn comparison with related *Acinetobacter* phages

| <b>Related<br/><i>Acinetobacter</i><br/>phages</b> | <b>#genes</b> | <b>Query<br/>coverage (%)</b> | <b>Identity-%</b> | <b>Accession-no</b> |
|----------------------------------------------------|---------------|-------------------------------|-------------------|---------------------|
| KARL-1                                             | 253           | 94                            | 98                | MH713599.1          |
| ZZ1                                                | 256           | 55                            | 75                | HQ698922.4          |
| Acj9                                               | 253           | 52                            | 71                | HM004124.1          |
| Acj61                                              | 241           | 46                            | 72                | GU911519.1          |
| Ac42                                               | 255           | 29                            | 69                | HM032710.1          |
| 133                                                | 257           | 18                            | 74                | HM114315.1          |

**Supplementary Table S4** Comparisons of conserved gene product content using CoreGenes3.5

| Accession-no | Name   | fHyAci03  |            |
|--------------|--------|-----------|------------|
|              |        | #homologs | %in common |
| MH713599.1   | KARL-1 | 239       | 96.76      |
| HQ698922.4   | ZZ1    | 190       | 76.92      |
| HM004124.1   | Acj9   | 192       | 77.73      |
| GU911519.1   | Acj61  | 178       | 72.06      |
| HM032710.1   | Ac42   | 154       | 62.35      |
| HM114315.1   | 133    | 152       | 61.54      |
| NC_000866.4  | T4     | 113       | 45.75      |
| NC_005066.1  | RB49   | 99        | 40.08      |
